# Supplementary material for: Identification of blood-feeding sources in Panstrongylus, Psammolestes, Rhodnius and Triatoma using amplicon-based next-generation sequencing
Source: PubMed Central journal article supplement (PMC7457505; doi:10.1186/s13071-020-04310-z), 2020-08-31

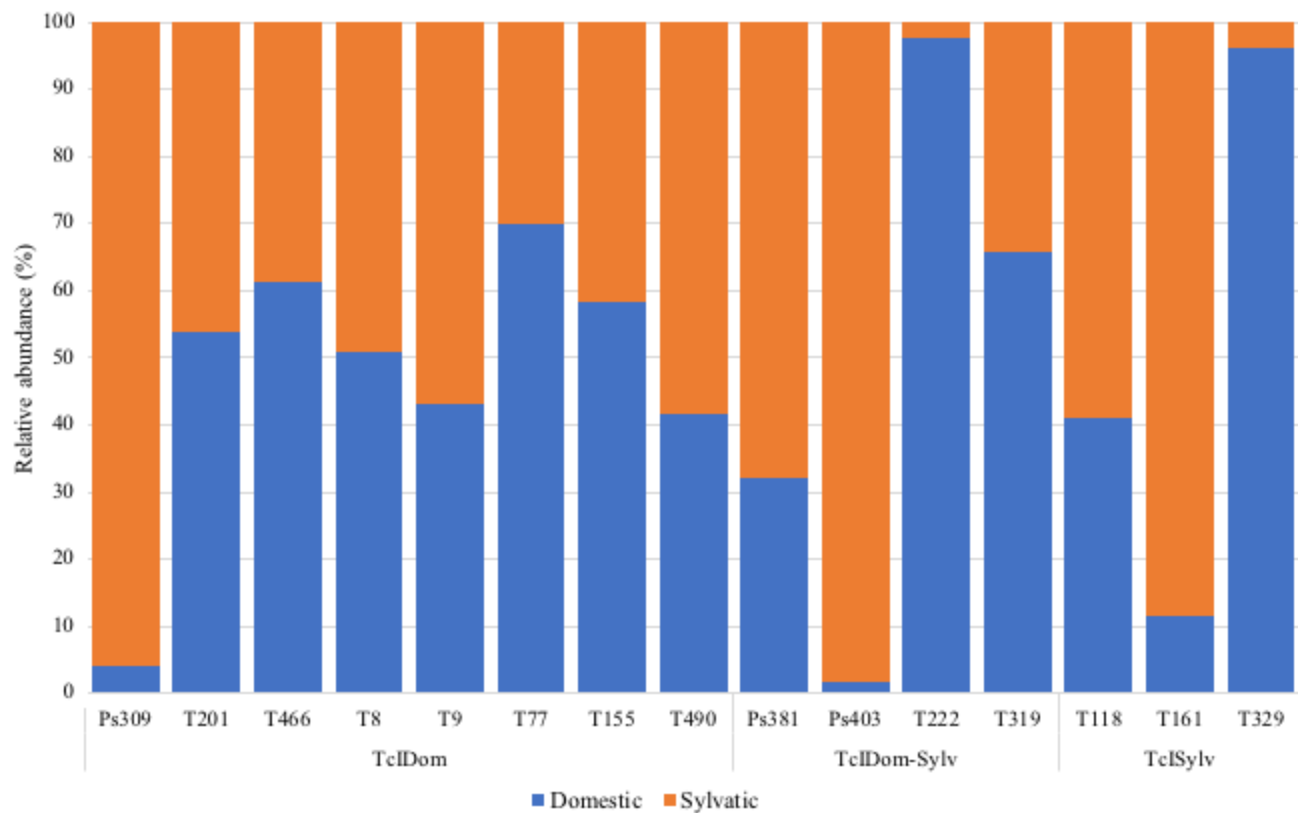

Supplement: 13071_2020_4310_MOESM6_ESM.pdf [file 13071_2020_4310_MOESM6_ESM.pdf]
